# Supplementary material for: Single-Cell Differential Network Analysis with Sparse Bayesian Factor Models
Source: PubMed Central journal article supplement (PMC8855158; doi:10.3389/fgene.2021.810816), 2022-02-04
Supplement: DataSheet1.pdf [file DataSheet1.pdf]

## Supplementary Material

# Single-cell Differential Network Analysis with Sparse Bayesian Factor Models

### 1 SUPPLEMENTARY FIGURES

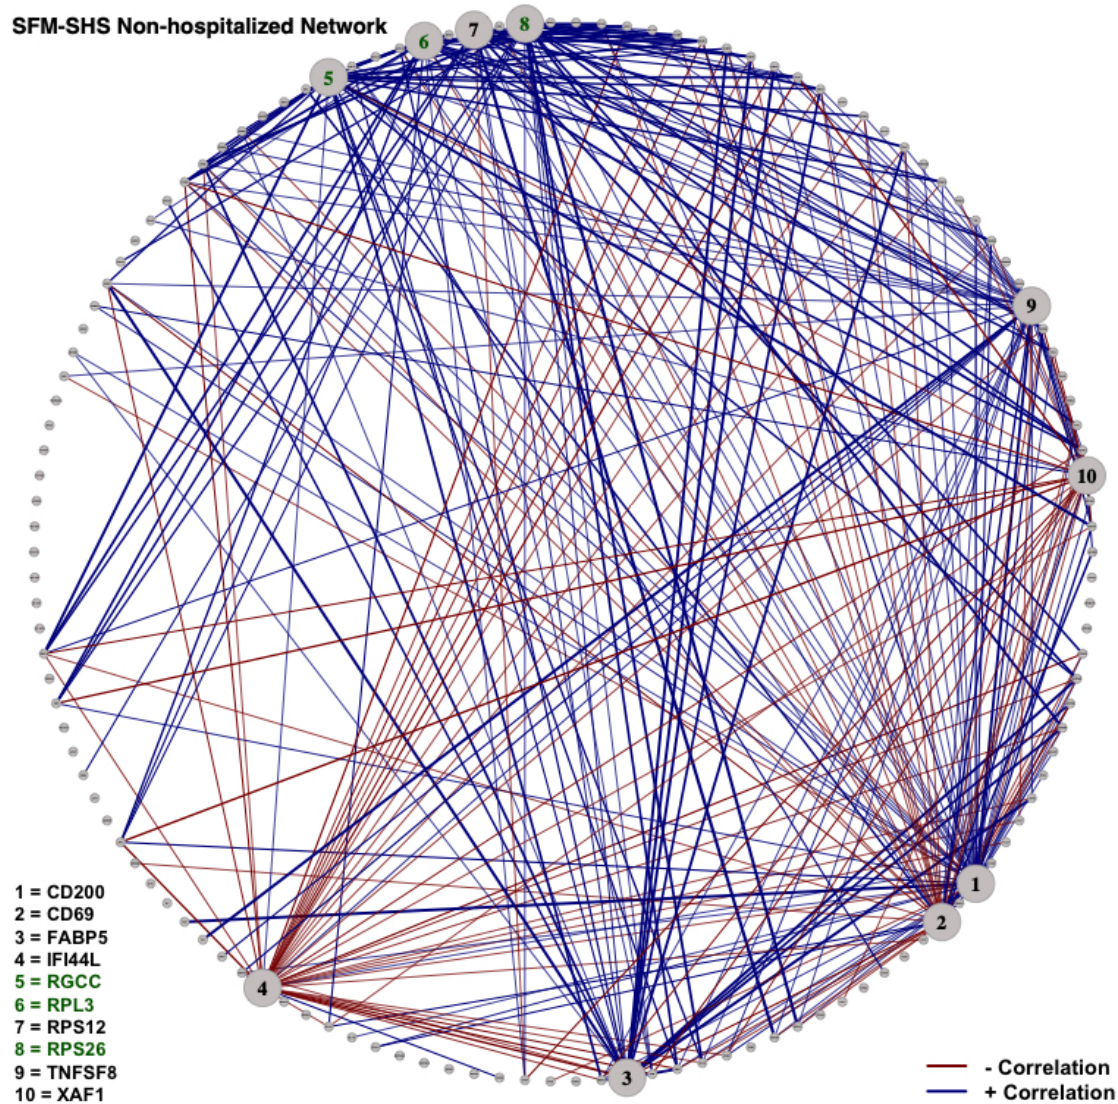

**Figure S1.** Network estimated by SFM-SHS with the bootstrap procedure for the non-hospitalized group in the SARS-CoV-2 case study dataset. Edges displayed are for 10 DCGs. The 7 unique top DCGs identified by both SFM-SHS and SFM-DHS are listed in black and the 3 top DCGs identified by all considered methods are listed in green. Each edge is colored to represent the direction of correlation.

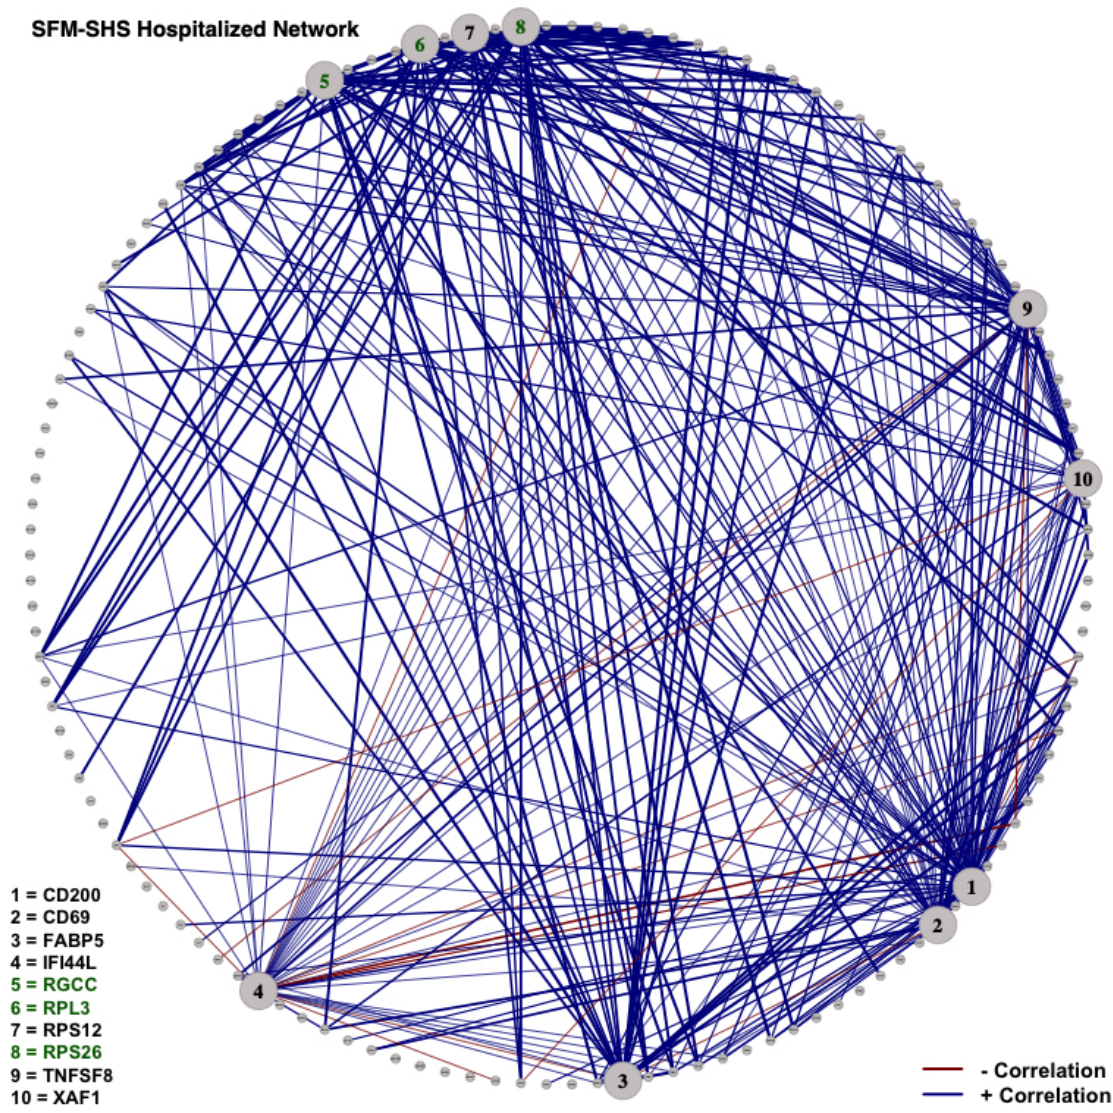

**Figure S2.** Network estimated by SFM-SHS with the bootstrap procedure for the hospitalized group in the SARS-CoV-2 case study dataset. Edges displayed are for 10 DCGs. The 7 unique top DCGs identified by both SFM-SHS and SFM-DHS are listed in black and the 3 top DCGs identified by all considered methods are listed in green. Each edge is colored to represent the direction of correlation.

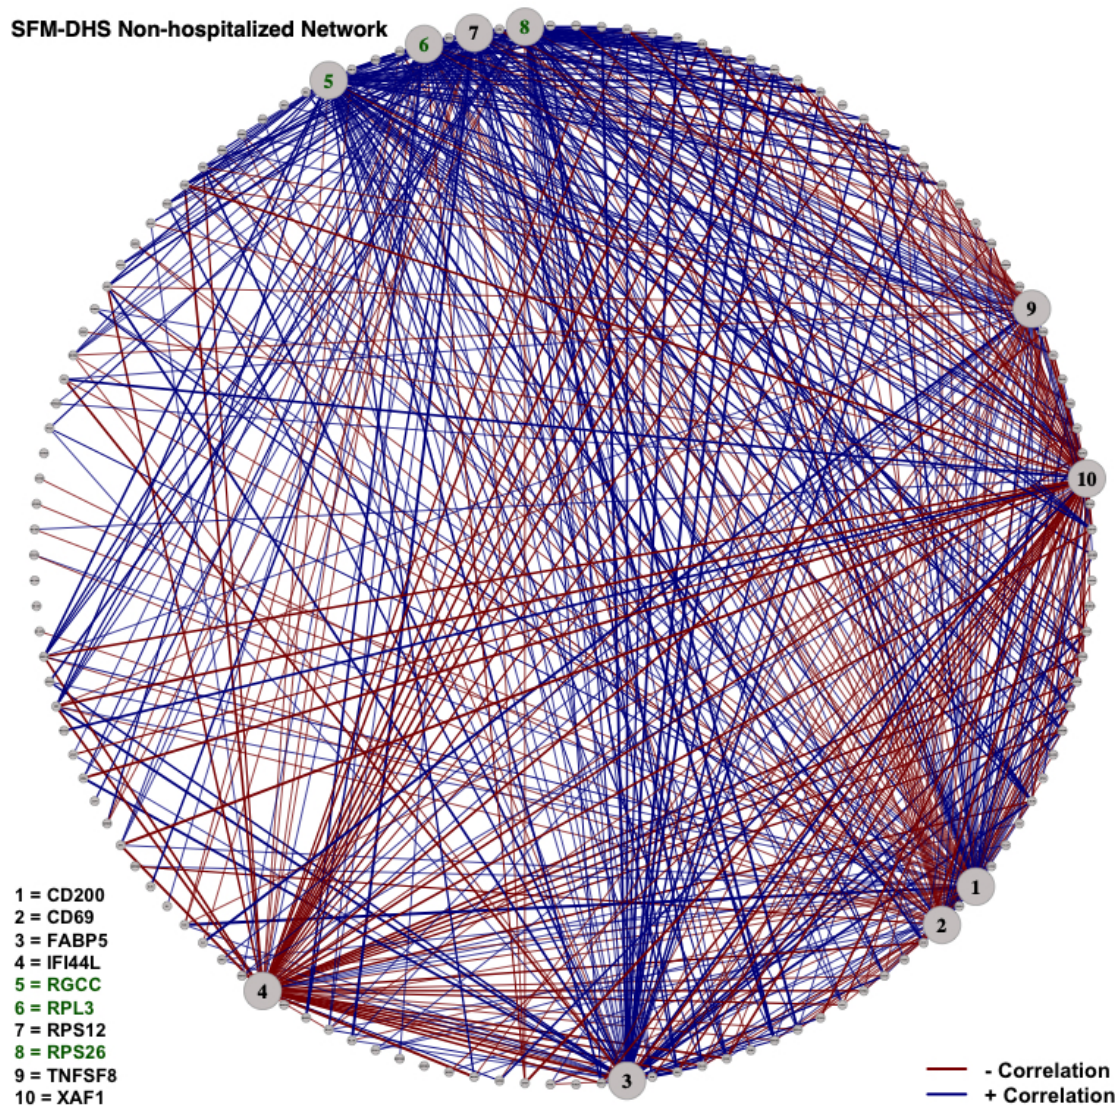

**Figure S3.** Network estimated by SFM-DHS with the bootstrap procedure for the non-hospitalized group in the SARS-CoV-2 case study dataset. Edges displayed are for 10 DCGs. The 7 unique top DCGs identified by both SFM-SHS and SFM-DHS are listed in black and the 3 top DCGs identified by all considered methods are listed in green. Each edge is colored to represent the direction of correlation.

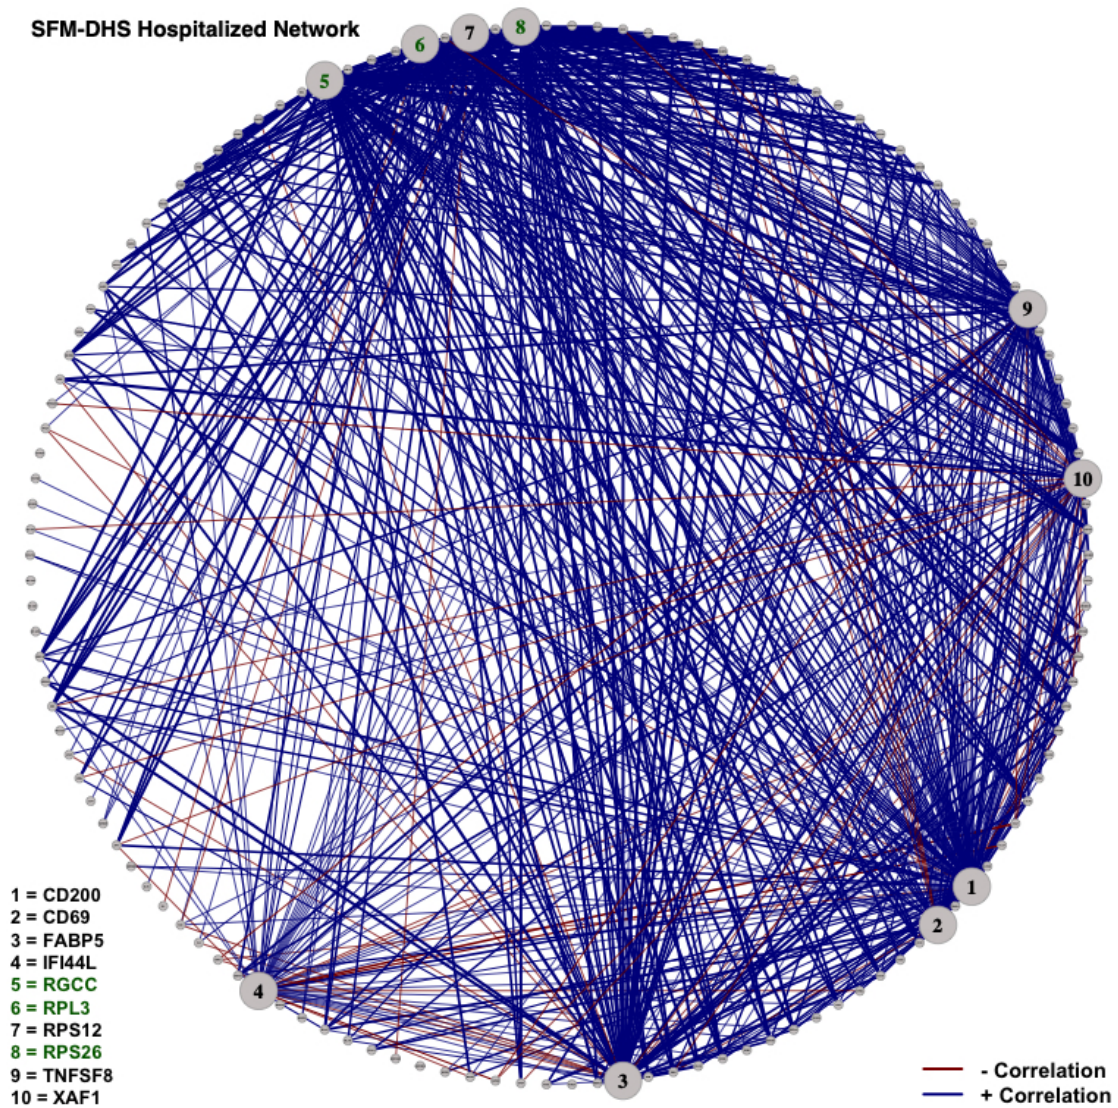

**Figure S4.** Network estimated by SFM-DHS with the bootstrap procedure for the hospitalized group in the SARS-CoV-2 case study dataset. Edges displayed are for 10 DCGs. The 7 unique top DCGs identified by both SFM-SHS and SFM-DHS are listed in black and the 3 top DCGs identified by all considered methods are listed in green. Each edge is colored to represent the direction of correlation.

## 2 SUPPLEMENTARY TABLES

| <b>Sim 1: <math>G = 50, N = 1000</math></b>   |         |         |           |           |
|-----------------------------------------------|---------|---------|-----------|-----------|
| <b>Network Structure A</b>                    | $TPR_0$ | $FDR_0$ | $AUROC_0$ | $Edges_0$ |
| SFM-SHS; $F = 8$                              | 0.766   | 0.082   | 0.978     | 292       |
| SFM-DHS; $F = 10$                             | 0.817   | 0.154   | 0.960     | 338       |
| DGCA                                          | 0.906   | 0.086   | 0.983     | 347       |
| <b>Network Structure B</b>                    |         |         |           |           |
| SFM-SHS; $F = 7$                              | 0.914   | 0.056   | 0.983     | 339       |
| SFM-DHS; $F = 13$                             | 0.923   | 0.225   | 0.942     | 417       |
| DGCA                                          | 0.937   | 0.000   | 0.985     | 328       |
| <b>Sim 2: <math>G = 50, N = 500</math></b>    |         |         |           |           |
| <b>Network Structure A</b>                    | $TPR_0$ | $FDR_0$ | $AUROC_0$ | $Edges_0$ |
| SFM-SHS; $F = 7$                              | 0.814   | 0.072   | 0.987     | 307       |
| SFM-DHS; $F = 8$                              | 0.840   | 0.133   | 0.980     | 339       |
| DGCA                                          | 0.911   | 0.000   | 0.997     | 319       |
| <b>Network Structure B</b>                    |         |         |           |           |
| SFM-SHS; $F = 7$                              | 0.951   | 0.015   | 0.995     | 338       |
| SFM-DHS; $F = 12$                             | 0.931   | 0.133   | 0.978     | 376       |
| DGCA                                          | 0.960   | 0.034   | 0.991     | 348       |
| <b>Sim 3: <math>G = 50, N = 2,000</math></b>  |         |         |           |           |
| <b>Network Structure A</b>                    | $TPR_0$ | $FDR_0$ | $AUROC_0$ | $Edges_0$ |
| SFM-SHS; $F = 8$                              | 0.863   | 0.000   | 0.995     | 302       |
| SFM-DHS; $F = 8$                              | 0.914   | 0.083   | 0.983     | 349       |
| DGCA                                          | 0.931   | 0.175   | 0.979     | 395       |
| <b>Network Structure B</b>                    |         |         |           |           |
| SFM-SHS; $F = 7$                              | 0.951   | 0.067   | 0.998     | 357       |
| SFM-DHS; $F = 8$                              | 0.991   | 0.202   | 0.987     | 435       |
| DGCA                                          | 0.977   | 0.128   | 0.997     | 392       |
| <b>Sim 4: <math>G = 100, N = 1,000</math></b> |         |         |           |           |
| <b>Network Structure A</b>                    | $TPR_0$ | $FDR_0$ | $AUROC_0$ | $Edges_0$ |
| SFM-SHS; $F = 8$                              | 0.918   | 0.000   | 0.998     | 1331      |
| SFM-DHS; $F = 8$                              | 0.921   | 0.123   | 0.975     | 1523      |
| DGCA                                          | 0.921   | 0.016   | 0.985     | 1358      |
| <b>Network Structure B</b>                    |         |         |           |           |
| SFM-SHS; $F = 7$                              | 0.987   | 0.120   | 0.991     | 1627      |
| SFM-DHS; $F = 10$                             | 0.974   | 0.259   | 0.954     | 1906      |
| DGCA                                          | 0.981   | 0.003   | 0.998     | 1426      |

**Table S1.** Comparison of the “true” control network structure and the estimated network structure in the simulation studies for SFM-SHS, SFM-DHS, and DGCA. Results displayed for SFM-SHS and SFM-DHS are from the bootstrap estimation procedure. The method of scdNet does not provide directly provide this estimation. In Sim 1 - 3, there are 350 “true” control network edges and in Sim 4 there are 1,450 “true” control network edges.

| <b>Sim 1: <math>G = 50, N = 1000</math></b>   |         |         |           |           |
|-----------------------------------------------|---------|---------|-----------|-----------|
| <b>Network Structure A</b>                    | $TPR_1$ | $FDR_1$ | $AUROC_1$ | $Edges_1$ |
| SFM-SHS; $F = 8$                              | 0.812   | 0.090   | 0.979     | 290       |
| SFM-DHS; $F = 10$                             | 0.883   | 0.201   | 0.957     | 359       |
| DGCA                                          | 0.902   | 0.039   | 0.953     | 305       |
| <b>Network Structure B</b>                    |         |         |           |           |
| SFM-SHS; $F = 7$                              | 0.969   | 0.003   | 1.000     | 316       |
| SFM-DHS; $F = 13$                             | 0.957   | 0.063   | 0.993     | 332       |
| DGCA                                          | 0.957   | 0.091   | 0.992     | 342       |
| <b>Sim 2: <math>G = 50, N = 500</math></b>    |         |         |           |           |
| <b>Network Structure A</b>                    | $TPR_1$ | $FDR_1$ | $AUROC_1$ | $Edges_1$ |
| SFM-SHS; $F = 7$                              | 0.822   | 0.000   | 0.994     | 267       |
| SFM-DHS; $F = 8$                              | 0.840   | 0.199   | 0.954     | 341       |
| DGCA                                          | 0.905   | 0.010   | 0.941     | 297       |
| <b>Network Structure B</b>                    |         |         |           |           |
| SFM-SHS; $F = 7$                              | 0.911   | 0.003   | 0.998     | 297       |
| SFM-DHS; $F = 12$                             | 0.908   | 0.007   | 0.993     | 297       |
| DGCA                                          | 0.966   | 0.003   | 0.989     | 315       |
| <b>Sim 3: <math>G = 50, N = 2,000</math></b>  |         |         |           |           |
| <b>Network Structure A</b>                    | $TPR_1$ | $FDR_1$ | $AUROC_1$ | $Edges_1$ |
| SFM-SHS; $F = 8$                              | 0.822   | 0.133   | 0.984     | 308       |
| SFM-DHS; $F = 8$                              | 1.000   | 0.201   | 0.970     | 407       |
| DGCA                                          | 0.991   | 0.108   | 0.998     | 361       |
| <b>Network Structure B</b>                    |         |         |           |           |
| SFM-SHS; $F = 7$                              | 0.902   | 0.064   | 0.985     | 313       |
| SFM-DHS; $F = 8$                              | 1.000   | 0.074   | 0.988     | 351       |
| DGCA                                          | 0.994   | 0.058   | 0.998     | 343       |
| <b>Sim 4: <math>G = 100, N = 1,000</math></b> |         |         |           |           |
| <b>Network Structure A</b>                    | $TPR_1$ | $FDR_1$ | $AUROC_1$ | $Edges_1$ |
| SFM-SHS; $F = 8$                              | 0.840   | 0.038   | 0.988     | 1179      |
| SFM-DHS; $F = 8$                              | 0.841   | 0.251   | 0.926     | 1517      |
| DGCA                                          | 0.973   | 0.077   | 0.988     | 1423      |
| <b>Network Structure B</b>                    |         |         |           |           |
| SFM-SHS; $F = 7$                              | 0.961   | 0.009   | 0.999     | 1310      |
| SFM-DHS; $F = 10$                             | 0.923   | 0.116   | 0.985     | 1410      |
| DGCA                                          | 0.982   | 0.019   | 0.997     | 1352      |

**Table S2.** Comparison of the “true” treatment network structure and the estimated network structure in the simulation studies for SFM-SHS, SFM-DHS, and DGCA. Results displayed for SFM-SHS and SFM-DHS are from the bootstrap estimation procedure. The method of scdNet does not provide directly provide this estimation. In Sim 1 - 3, there are 325 “true” treatment network edges and in Sim 4 there are 1,350 “true” treatment network edges.
